# Supplementary material for: Plasma IAPP-Autoantibody Levels in Alzheimer’s Disease Patients Are Affected by APOE4 Status
Source: MDPI journal article supplement (doi:10.3390/ijms24043776), 2023-02-14
Supplement: s1 [file s1]

**Table S1.** Plasma IAPP-Ig levels in Cohort I.

| <b>IAPP-Ig (RU):</b>                | <b>NC (n=42)</b> | <b>AD (n=30)</b> | <b>-APOE4 (n=35)</b> | <b>+APOE4 (n=37)</b> |
|-------------------------------------|------------------|------------------|----------------------|----------------------|
| IAPP <sub>M</sub> -IgG              | 46.5±29.9        | 48.1±24.2        | 51.0±30.1            | 43.5±24.6            |
| IAPP <sub>O</sub> -IgG              | 70.6±58.0        | 64.6±26.3        | 75.0±63.0            | 61.6±23.9            |
| IAPP <sub>M</sub> -IgM <sup>a</sup> | 158.2±83.1       | 177.8±96.4       | 162.9±74.9           | 170.1±101.3          |
| IAPP <sub>O</sub> -IgM              | 212.2±245.2      | 198.6±109.6      | 211.0±210.9          | 202.3±190.1          |
| IAPP <sub>M</sub> -IgA              | 8.1±5.2          | 7.4±4.8          | 8.5±5.5              | 7.2±4.4              |
| IAPP <sub>O</sub> -IgA              | 21.5±14.5        | 17.4±10.6        | 23.7±13.7            | 16.0±11.4**          |

<sup>a</sup>n=40 in NC. Data was analyzed using Mann-Whitney test and values are presented as mean value ± SD. AD – Alzheimer's disease, APOE – apolipoprotein E, IAPP – islet amyloid polypeptide, Ig – immunoglobulin, M – monomer, NC – non-demented control, O – oligomer, RU – relative unit. \*\*Significant at p≤0.01 level.

**Table S2.** Plasma IAPP-Ig and brain IAPP levels in Cohort II.

|                                     | <b>-Aβ (n=10)</b> | <b>+Aβ (n=19)</b> | <b>p-value*</b> | <b>-APOE4 (n=15)</b> | <b>+APOE4 (n=14)</b> | <b>p-value*</b> |
|-------------------------------------|-------------------|-------------------|-----------------|----------------------|----------------------|-----------------|
| IAPP <sub>M</sub> -IgG <sup>a</sup> | 21.9±12.2         | 25.5±34.8         | 0.875           | 18.9±10.1            | 30.0±40.0            | 0.340           |
| IAPP <sub>O</sub> -IgG <sup>a</sup> | 34.8±29.2         | 51.8±80.4         | 0.751           | 34.4±18.3            | 58.3±94.9            | 0.412           |
| IAPP <sub>M</sub> -IgM <sup>a</sup> | 65.7±56.1         | 71.6±39.1         | 0.462           | 64.0±45.9            | 75.6±44.4            | 0.413           |
| IAPP <sub>O</sub> -IgM <sup>a</sup> | 35.4±26.7         | 62.9±94.2         | 0.351           | 57.0±96.4            | 49.5±55.8            | 0.802           |
| IAPP <sub>M</sub> -IgA <sup>a</sup> | 9.3±7.0           | 12.9±7.2          | 0.099           | 11.7±8.9             | 11.5±5.3             | 0.977           |
| IAPP <sub>O</sub> -IgA <sup>a</sup> | 14.3±23.8         | 31.3±29.2*        | 0.174           | 26.3±32.3            | 24.5±24.4            | 0.802           |
| IAPP-SF <sup>b</sup>                | 1.9±2.0           | 2.4±3.4           | 0.546           | 2.2±2.7              | 2.2±3.2              | 0.999           |
| IAPP-IF <sup>b</sup>                | 0.4±0.0           | 0.4±0.1           | 0.441           | 0.4±0.1              | 0.4±0.1              | 0.948           |

<sup>a</sup>Plasma IAPP-Ig levels (RU). <sup>b</sup>Brain IAPP levels (RU). \*Corrected for Type 2 diabetes. Data was analyzed using either Student's t-test or Mann-Whitney test, and values are presented as mean value ± SD. Aβ - amyloid beta, APOE – apolipoprotein E, IAPP – islet amyloid polypeptide, Ig – immunoglobulin, M – monomer, O – oligomer, RU – relative unit. \*Significant at p≤0.05 level.

**Table S3.** Plasma IAPP-Ig levels in males and females in Cohort I.

| <b>IAPP-Ig (RU):</b>                | <b>Males (n=22)</b> | <b>Females (n=50)</b> |
|-------------------------------------|---------------------|-----------------------|
| IAPP <sub>M</sub> -IgG              | 49.4±26.1           | 46.2±28.3             |
| IAPP <sub>O</sub> -IgG              | 72.8±50.8           | 66.0±46.0             |
| IAPP <sub>M</sub> -IgM <sup>a</sup> | 147.2±67.3          | 174.9±96.1            |
| IAPP <sub>O</sub> -IgM              | 212.0±217.4         | 204.2±192.8           |
| IAPP <sub>M</sub> -IgA              | 8.1±5.4             | 7.7±4.8               |
| IAPP <sub>O</sub> -IgA              | 21.6±15.6           | 19.0±11.9             |

<sup>a</sup>n=21 males and n=49 females. Data was analyzed using Mann-Whitney test and values are presented as mean ± SD. IAPP – islet amyloid polypeptide, Ig – immunoglobulin, M – monomer, O – oligomer, RU – relative unit.

**Table S4.** Plasma IAPP-Ig levels in males and females in Cohort II.

| IAPP-Ig (RU):          | Males (n=12) | Females (n=17) | p-value* |
|------------------------|--------------|----------------|----------|
| IAPP <sub>M</sub> -IgG | 18.3±6.1     | 28.5±37.1      | 0.356    |
| IAPP <sub>O</sub> -IgG | 69.1±99.2    | 29.6±20.2      | 0.131    |
| IAPP <sub>M</sub> -IgM | 73.4±49.5    | 66.9±42.4      | 0.675    |
| IAPP <sub>O</sub> -IgM | 42.4±60.5    | 61.1±89.5      | 0.543    |
| IAPP <sub>M</sub> -IgA | 10.8±5.8     | 12.2±8.2       | 0.631    |
| IAPP <sub>O</sub> -IgA | 20.1±18.5    | 29.1±33.5      | 0.394    |

\*Corrected for Type 2 diabetes. Data was analyzed using Mann-Whitney test and values are presented as mean ± SD. IAPP – islet amyloid polypeptide, Ig – immunoglobulin, M – monomer, O – oligomer, RU – relative unit.

**Table S5.** Plasma IAPP-Ig levels across APOE genotypes in Cohort I.

| IAPP-Ig (RU):                       | APOE23 (n=4) | APOE33 (n=31) | APOE24 (n=2)* | APOE34 (n=29) | APOE44 (n=6) |
|-------------------------------------|--------------|---------------|---------------|---------------|--------------|
| IAPP <sub>M</sub> -IgG              | 41.0±7.5     | 52.3±31.8     | 19.7±21.2     | 44.5±23.2     | 46.5±31.7    |
| IAPP <sub>O</sub> -IgG              | 62.9±9.5     | 76.5±66.8     | 43.0±11.6     | 61.3±19.0     | 69.1±43.0    |
| IAPP <sub>M</sub> -IgM <sup>a</sup> | 186.3±52.8   | 159.7±77.5    | 112.5±3.0     | 166.8±101.1   | 204.7±117.4  |
| IAPP <sub>O</sub> -IgM              | 144.3±29.9   | 219.6±222.9   | 91.5±30.6     | 204.2±206.1   | 230.5±127.2  |
| IAPP <sub>M</sub> -IgA              | 8.8±5.2      | 8.5±5.6       | 11.0±6.0      | 7.3±4.4       | 5.4±3.5      |

<sup>a</sup>n=30 APOE33 and n=28 APOE34. \*Not included in the Kruskal-Wallis test. Data was analyzed using Kruskal-Wallis test and values are presented as mean ± SD. APOE – apolipoprotein E, IAPP – islet amyloid polypeptide, Ig – immunoglobulin, M – monomer, O – oligomer, RU – relative unit.

**Table S6.** Plasma IAPP-Ig levels in non-demented controls and AD patients stratified upon the APOE4 status in Cohort I.

| IAPP-Ig (RU):                       | NC            |               | AD           |               |
|-------------------------------------|---------------|---------------|--------------|---------------|
|                                     | -APOE4 (n=26) | +APOE4 (n=16) | -APOE4 (n=9) | +APOE4 (n=21) |
| IAPP <sub>M</sub> -IgG              | 48.1±29.5     | 43.9±31.2     | 59.6±32.1    | 43.1±18.8     |
| IAPP <sub>O</sub> -IgG              | 78.1±72.0     | 58.5±17.9     | 66.1±23.6    | 63.9±27.8     |
| IAPP <sub>M</sub> -IgM <sup>a</sup> | 154.1±72.5    | 165.1±100.6   | 187.2±80.1   | 173.8±104.1   |
| IAPP <sub>O</sub> -IgM              | 205.4±241.2   | 223.4±259.1   | 227.4±83.4   | 186.3±118.7   |

<sup>a</sup>n=25 -APOE4 and n=15 +APOE4. Data was analyzed using Mann-Whitney test and values are presented as mean ± SD. AD – Alzheimer's disease, APOE – apolipoprotein E, IAPP – islet amyloid polypeptide, Ig – immunoglobulin, M – monomer, NC – non-demented control, O – oligomer, RU – relative unit.

**Table S7.** Clinical data of Cohort I individuals stratified by AD diagnosis.

| <b>Variables:</b>                  | <b>NC, n=42</b> | <b>AD, n=30</b>  |
|------------------------------------|-----------------|------------------|
| Age (years)                        | 74±6            | 74±7             |
| APOE4 carriers, n (%) <sup>a</sup> | 16/42 (38%)     | 21/30 (70%)      |
| Females, n (%) <sup>a</sup>        | 29/42 (69%)     | 21/30 (70%)      |
| MMSE (score)                       | 29.19±0.83      | 19.50±4.26***    |
| ADAS-Cog (score)                   | 1.88±1.70       | 8.67±1.90***     |
| AQT (sec)                          | 63.24±10.36     | 110.18±46.72***  |
| CRP (mg/l)                         | 1.75±1.59       | 6.94±13.12*      |
| Q-albumin                          | 6.75±3.80       | 6.80±2.54        |
| CSF Aβ40 (pg/ml)                   | 6759.52±1906.93 | 6452.66±1675.20  |
| CSF Aβ42 (pg/ml)                   | 791.67±289.29   | 386.70±110.29*** |
| CSF p-tau (pg/ml)                  | 45.61±18.16     | 120.40±41.24***  |
| CSF t-tau (pg/ml)                  | 341.53±106.23   | 621.81±207.42*** |
| Plasma IAPP (pM)                   | 260.96±165.03   | 316.82±159.52    |
| Total IgA (mg/ml)                  | 3.44±1.58       | 4.21±1.52*       |

<sup>a</sup>Data is presented for illustrative purposes and was not analyzed. Data was analyzed using either Student's t-test or Mann-Whitney test, and values are presented as mean value ± SD. Aβ - amyloid beta, AD - Alzheimer's disease, ADAS-Cog - Alzheimer's Disease Assessment Scale - Cognitive Subscale, APOE - apolipoprotein E, AQT - A Quick Test, CRP - C-reactive protein, CSF - cerebrospinal fluid, IAPP - islet amyloid polypeptide, Ig - immunoglobulin, MMSE - Mini-Mental State Examination, NC - non-demented control, p-tau - phosphorylated tau, t-tau - total tau. \*Significant at p≤0.05 level. \*\*\*Significant at p≤0.001 level.

**Table S8.** Clinical data of Cohort II cases stratified by brain Aβ pathology status.

| <b>Variables:</b>                  | <b>-Aβ, n=10</b> | <b>+Aβ, n=19</b> |
|------------------------------------|------------------|------------------|
| Age (years)                        | 75±9             | 81±11            |
| APOE4 carriers, n (%) <sup>a</sup> | 2/10 (20%)       | 12/19 (63%)      |
| T2D positive, n (%) <sup>a</sup>   | 5/10 (50%)       | 3/19 (16%)       |
| Females, n (%) <sup>a</sup>        | 6/10 (60%)       | 11/19 (58%)      |
| PMD (h)                            | 7.33±2.01        | 6.18±1.39        |
| Plasma IAPP (pM)                   | 241.11±20.21     | 252.65±30.43     |
| Total IgA (mg/ml)                  | 46.74±51.31      | 84.23±47.65      |

<sup>a</sup>Data is presented for illustrative purposes and was not analyzed. Data was analyzed using either Student's t-test or Mann-Whitney test, and values are presented as mean value ± SD. Aβ - amyloid beta, APOE - apolipoprotein E, IAPP - islet amyloid polypeptide, Ig - immunoglobulin, PMD - postmortem delay, T2D - Type 2 diabetes.

**Table S9.** Demographic data and neuropathological assessment of individuals included in Cohort II.

| <b>Clinical diagnosis</b> | <b>Age (years)</b> | <b>Sex (M/F)</b> | <b>APOE genotype</b> | <b>T2D (-/+)</b> | <b>A<math>\beta</math>/NFT/LB<sup>a</sup></b> | <b>Cause of death</b>                                                        |
|---------------------------|--------------------|------------------|----------------------|------------------|-----------------------------------------------|------------------------------------------------------------------------------|
| AD                        | 90                 | F                | 2/3                  | -                | B/2/5                                         | General physical deterioration, palliative sedation                          |
| AD                        | 90                 | F                | 3/3                  | -                | C/6/5                                         | General deterioration in end-stage dementia syndrome                         |
| AD                        | 83                 | M                | 3/4                  | -                | B/3/0                                         | Dehydration after CVA and mixed vascular/Alzheimer's dementia                |
| AD                        | 64                 | F                | 4/4                  | -                | C/4/0                                         | Euthanasia with progressed AD                                                |
| AD                        | 72                 | M                | 3/4                  | -                | C/6/0                                         | Pneumonia and stomach bleeding                                               |
| AD                        | 76                 | M                | 4/4                  | -                | C/6/0                                         | Dehydration, pneumonia                                                       |
| AD                        | 91                 | F                | 3/4                  | -                | C/5/5                                         | Palliative care after CVA                                                    |
| AD                        | 64                 | M                | 3/4                  | -                | C/6/5                                         | Euthanasia                                                                   |
| AD                        | 74                 | M                | 3/4                  | +                | C/4/6                                         | Dehydration                                                                  |
| AD                        | 83                 | M                | 3/3                  | -                | C/4/6                                         | Gastroenteritis or respiratory tract infection by advanced dementia syndrome |
| AD                        | 88                 | F                | 3/3                  | -                | C/5/5                                         | Cachexia with vascular dementia                                              |
| AD                        | 91                 | F                | 3/3                  | +                | C/4/0                                         | CVA                                                                          |
| AD                        | 88                 | F                | 3/4                  | -                | C/5/0                                         | Pneumonia/palliative sedation                                                |
| AD                        | 65                 | F                | 3/4                  | -                | C/5/1                                         | Dehydration by respiratory tract infection by end-stage dementia             |
| AD                        | 92                 | F                | 3/4                  | -                | C/6/0                                         | 3 <sup>rd</sup> degree atrioventricular block and severe AD                  |
| AD                        | 63                 | M                | 4/4                  | +                | C/4/6                                         | Hepatic insufficiency on the bases of metastases from unknown tumor          |
| FTD                       | 69                 | F                | 3/3                  | +                | O/0/0                                         | Infection                                                                    |
| HA                        | 72                 | M                | 3/4                  | -                | O/2/0                                         | Pneumonia                                                                    |
| MS                        | 78                 | M                | 3/3                  | +                | O/2/0                                         | Euthanasia                                                                   |
| MS                        | 87                 | F                | 3/3                  | +                | A/2/0                                         | Dehydration and renal insufficiency                                          |
| MS                        | 60                 | F                | 3/4                  | +                | A/0/0                                         | MS with decreased intake                                                     |
| NC                        | 75                 | F                | 3/3                  | -                | O/1/0                                         | Euthanasia                                                                   |
| NC                        | 92                 | F                | 3/3                  | -                | A/1/3                                         | Euthanasia                                                                   |
| NC                        | 87                 | F                | 3/3                  | -                | B/1/4                                         | Respiratory insufficiency by pneumonia and exhaustion                        |
| NC                        | 75                 | M                | 3/3                  | -                | A/1/0                                         | Cardiac arrest with COPD                                                     |
| NC                        | 70                 | M                | 2/3                  | -                | O/1/3                                         | Pneumonia with cardiogenic shock                                             |
| NC                        | 68                 | F                | 3/3                  | +                | O/1/0                                         | Euthanasia                                                                   |
| NC                        | 81                 | M                | 3/4                  | -                | C/3/0                                         | Terminal pancreas carcinoma                                                  |
| VaD                       | 93                 | F                | 3/3                  | -                | B/2/0                                         | Heart failure                                                                |

<sup>a</sup>ABC staging of amyloid beta (A $\beta$ ), Braak staging of neurofibrillary tangles (NFT) and Lewy bodies (LB). A $\beta$  - amyloid beta, AD - Alzheimer's disease, APOE - apolipoprotein E, COPD - chronic obstructive pulmonary disease, CVA - cerebrovascular accident, F - female, LB - Lewy body, FTD - frontotemporal dementia, HA - hippocampal alterations, M - male, MS - multiple sclerosis, NC - non-demented control, NFT - neurofibrillary tangle, T2D - Type 2 diabetes, VaD - vascular dementia.

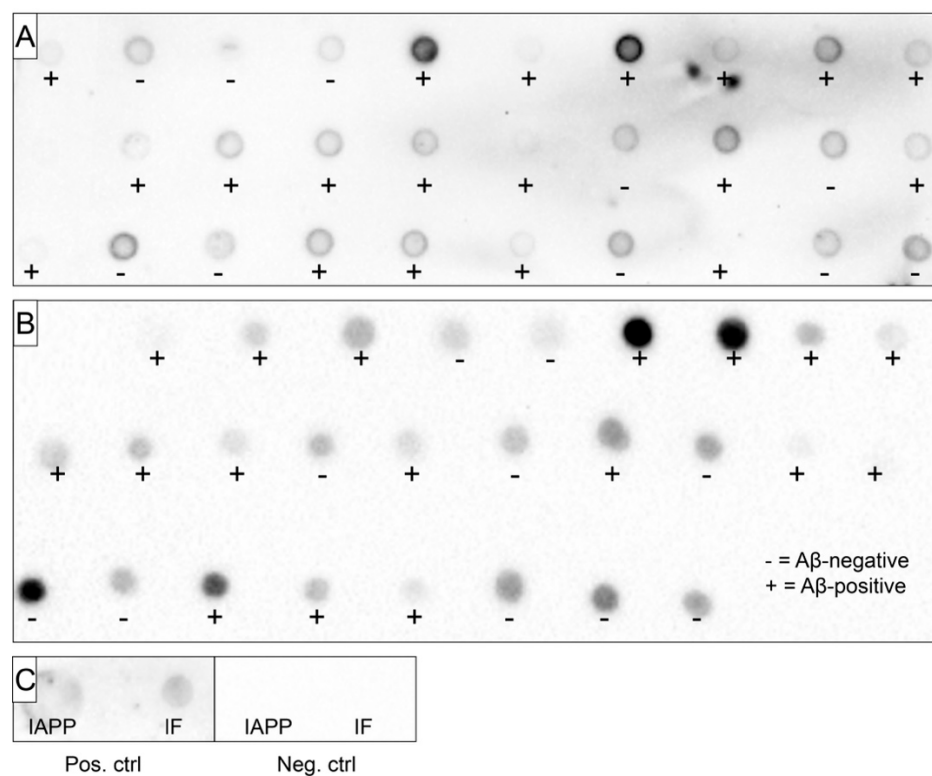

**Figure S1. Dot-blot of brain insoluble and soluble IAPP fractions.** The dot-blot shows brain insoluble (A) and soluble (B) IAPP fractions in samples from A $\beta$ -negative (-) and A $\beta$ -positive (+) cases. Positive and negative controls, an IAPP peptide (EZHA-52K, Merck, Sweden) on the left and a sample with IAPP-IF on the right, are indicated in (C).

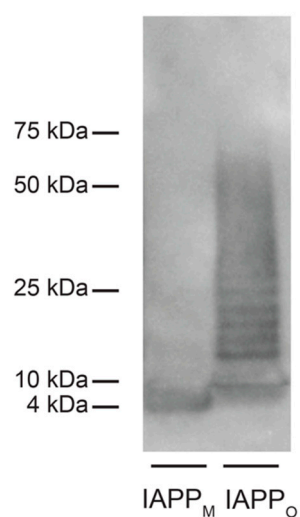

**Figure S2. Characterization of IAPP self-assembly products.** Western-Blot analysis of IAPP monomers (IAPP<sub>M</sub>) and oligomers (IAPP<sub>O</sub>).
